# Supplementary material for: NiFe2O4/poly(ethylene glycol)/lipid–polymer hybrid nanoparticles for anti-cancer drug delivery
Source: Royal Society of Chemistry journal article supplement (doi:10.1039/d0nj01163k), 2020-01-01

## Supplementary Informations

**Figure.S.1** IR spectrum of (A) AZT, NLPNs, (B) NLPNs, PEG, SA and PVA

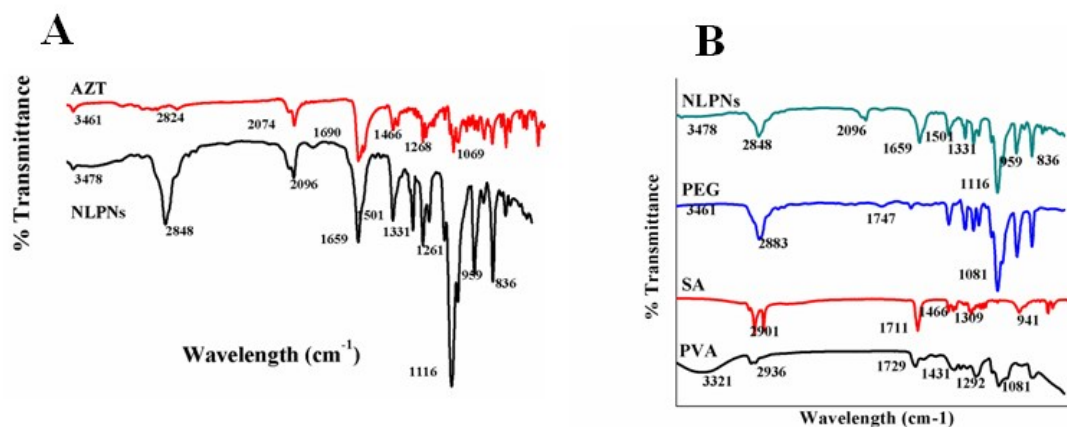

**Figure.S.2** The size distribution curve of the NLPNs

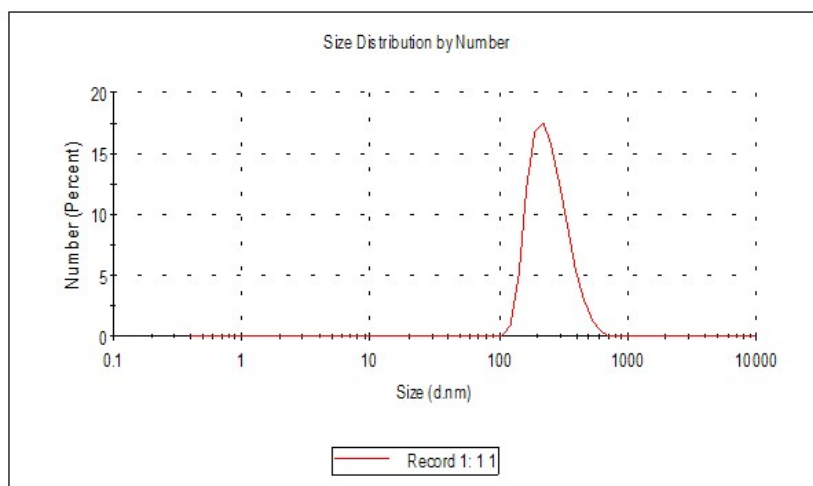

**Figure.S.3** Cytotoxicity experiment of (A) NFO at different nanoparticle concentration and (B) different materials involved in the formation of NLPNs made in Fibroblast cells.

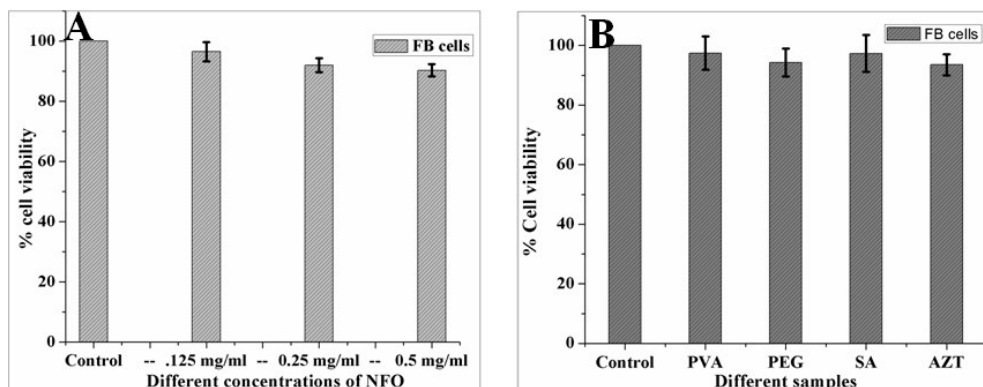

Supplement: d0nj01163k1.pdf [file d0nj01163k1.pdf]
